# Supplementary material
Source: PubMed Central journal article supplement (PMC8527596)
Supplement: mmc1.pdf [file mmc1.pdf]

## Supplementary Figure 1

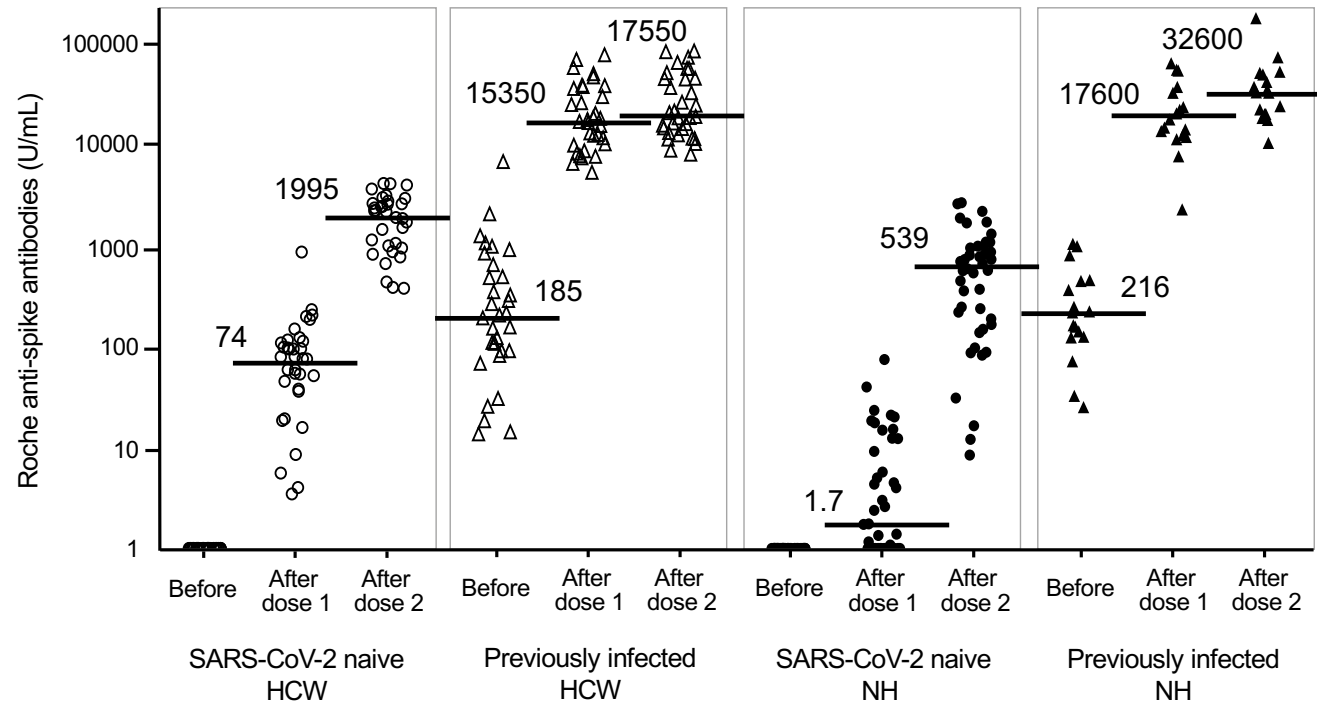

**Supplementary Fig. 1.** Roche anti-spike antibody levels before and after BNT162b2 mRNA vaccination in SARS-CoV-2-naive and previously infected healthcare workers and nursing home residents. The white circles indicate data of SARS-CoV-2-naive healthcare workers (n = 34). The white triangles indicate data of previously infected healthcare workers (n = 32). The black circles indicate data of SARS-CoV-2-naive residents (n = 43). The black triangles indicate data of previously infected residents (n = 17). The horizontal solid bars and numbers in each group indicate the median values. 0.8 U/mL is a cut-off value. SARS-CoV-2, severe acute respiratory syndrome coronavirus 2; HCW, healthcare workers; NH, nursing home residents
